# Supplementary material
Source: PubMed Central journal article supplement (PMC5472819)
Supplement: JB.00036-17_zjb999094439s5.pdf [file JB.00036-17_zjb999094439s5.pdf]

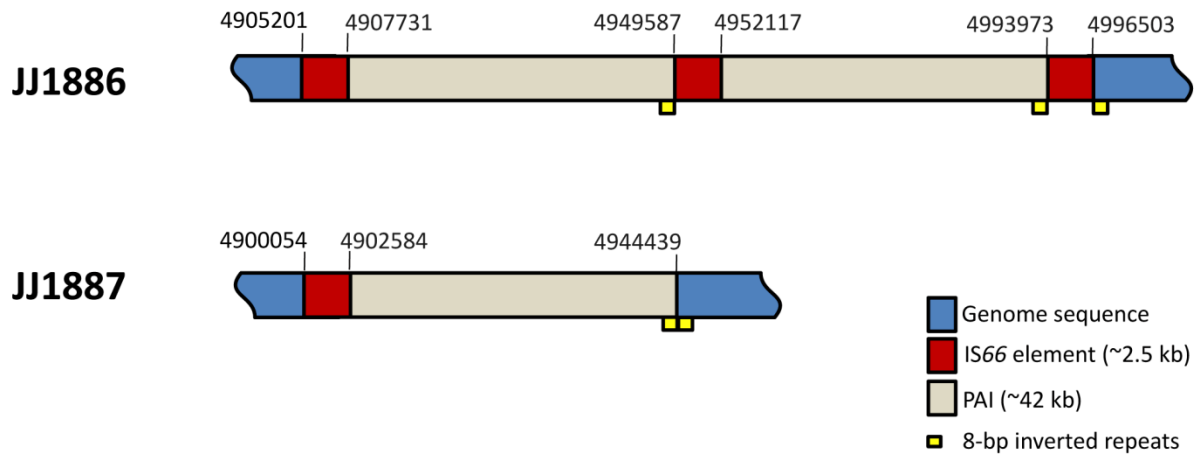

**Figure S1. Schematic representation of pathogenicity-associated island (PAI) duplication in chromosome of JJ1886.**

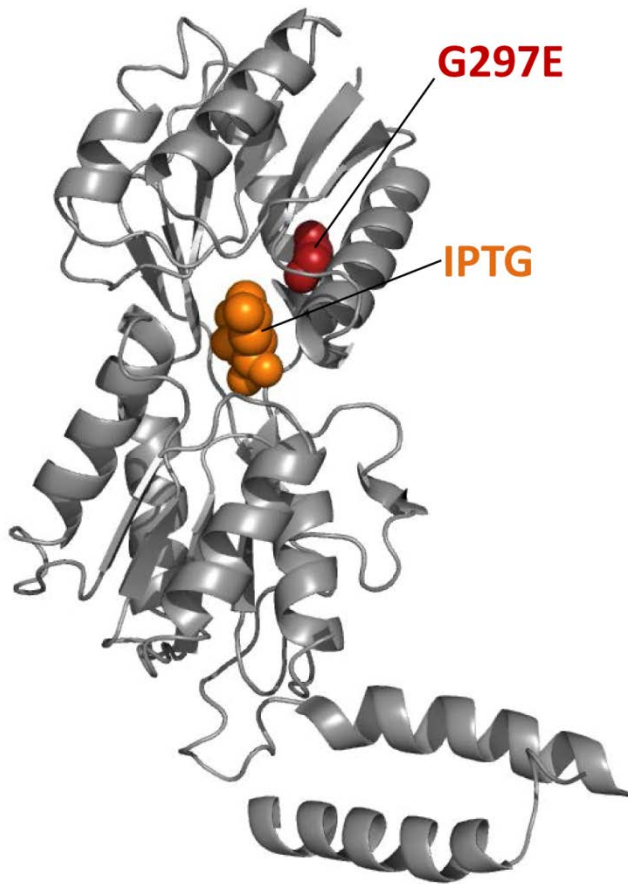

**Figure S2. Distribution of structural mutations in the tertiary structure of *E. coli* LacI.** The ribbon representation of the *E. coli* K12 LacI monomer as in a crystal structure 1LBH (PDB) (1). The position of G297 is shown as a red spheres. An inhibitor molecule of the LacI (isopropyl  $\beta$ -D-1-thiogalactopyranoside, IPTG) occupying the substrate-binding pocket is shown in orange.

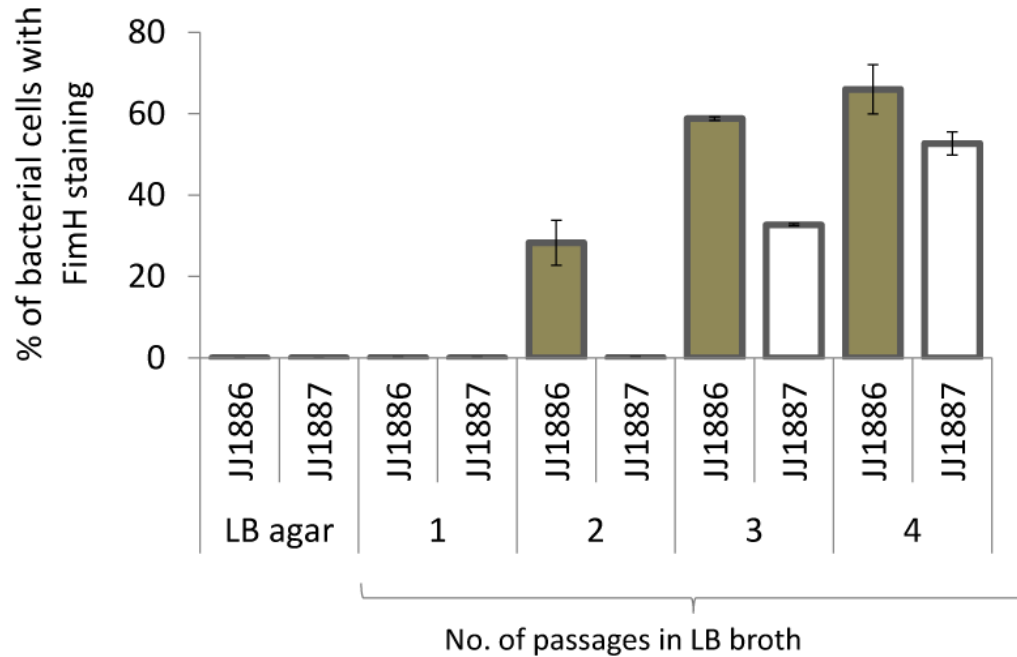

**Figure S3. Flow cytometry analysis of type-1 fimbriae expression.** JJ1886 and JJ1887 cells were fixed, then stained with an anti-FimH monoclonal antibody (mAb21), followed by a secondary Alexa Fluor488-conjugated anti-mouse antibody. For each sample, the fluorescence of 100, 000 events was measured using FACScan (Becton Dickinson). Data shown are mean  $\pm$  SD for two biological replicates from one representative experiment.

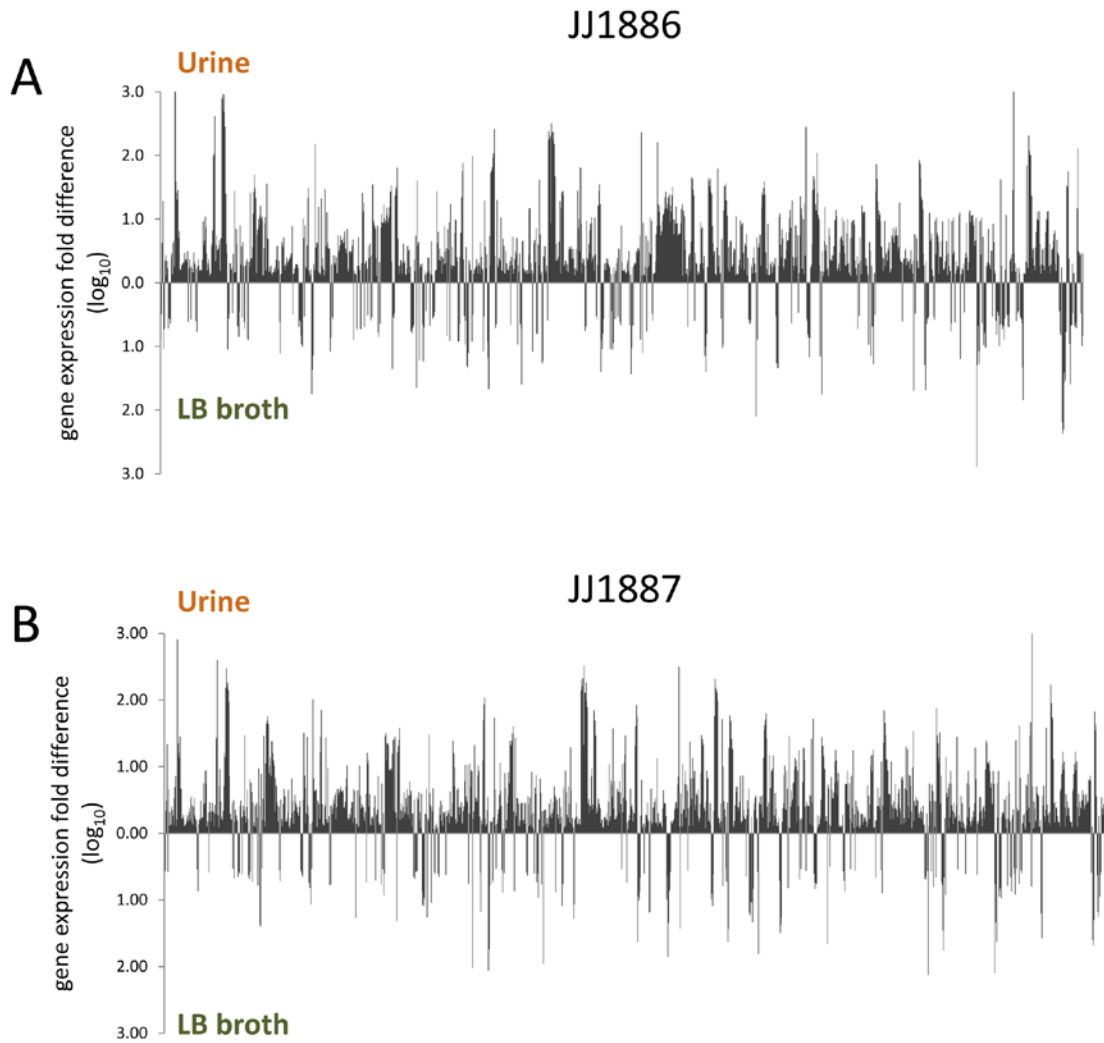

**Figure S4. Differential gene expression of two sisters' strains under diverse growth**

**conditions.** Gene expression in bacteria grown in urine or LB broth was determined by whole-transcriptome analysis. The X-axis represents genes with differential expression in urine vs LB broth, ordered by chromosomal position. The Y-axis shows the log<sub>10</sub> of the fold difference in gene expression level for growth in urine vs. LB broth. The upper Y-axis shows genes that are relatively upregulated in urine; the lower Y-axis shows genes that are relatively upregulated in LB broth. Data are shown only for annotated genes. Average data for three biological replicates are shown.

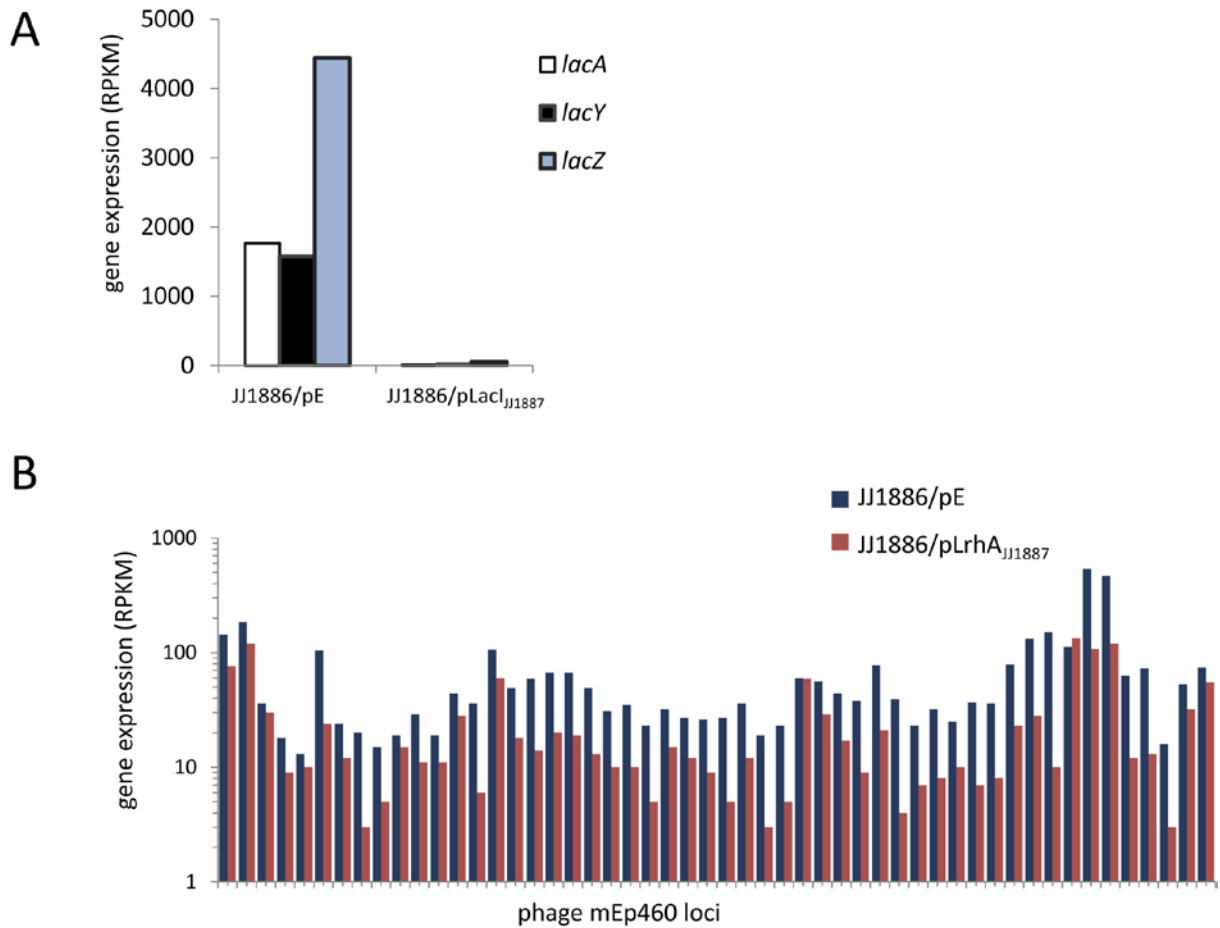

**Figure S5. Differential expression of selected genes in JJ1886 transformants carrying pACYC184, pLacIJJ1887, and pLrhAJJ1887.** Expression of lac operon genes (A) and mEp460 phage genes (B) in derivatives of JJ1886 transformed with an empty pACYC184 plasmid (pE; control) or pACYC184 carrying lacI<sub>JJ1887</sub> or lrhA<sub>JJ1887</sub>. Gene expression levels in bacteria grown in urine, as determined by RNAseq, are shown as RPKM (reads per kilobase per million mapped reads). Average data for two biological replicates are shown.

**A**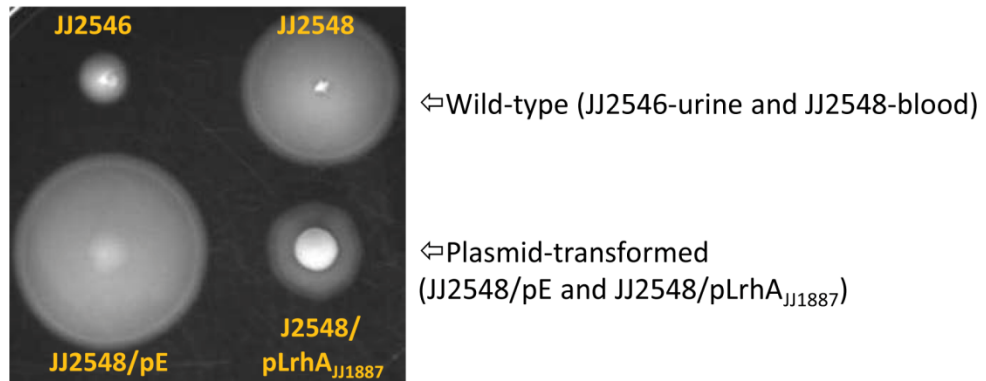**B**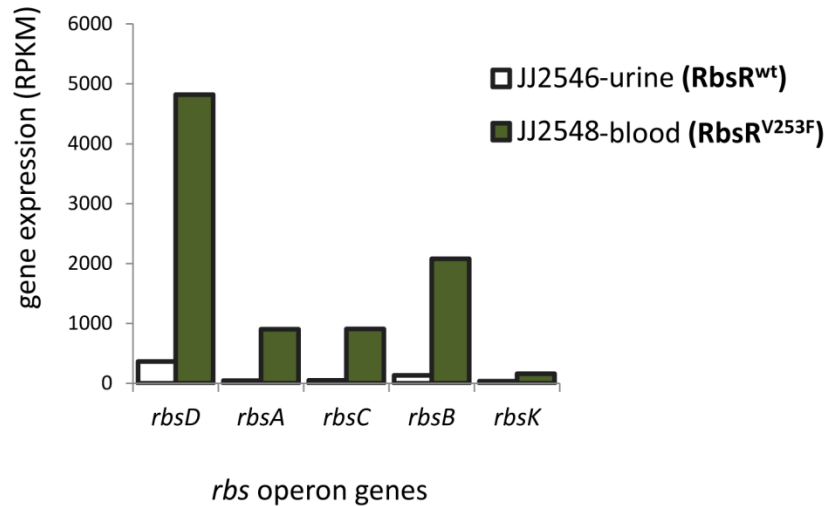

**Figure S6. Functional validation of selected mutations detected in household #2 strains.**

(A) Motility of wild-type strains (JJ2546 and JJ2548) and plasmid-complemented derivatives of strain JJ2548 (carrying pE or pLrhA<sub>JJ1887</sub>), grown for 6h on LB 0.2 % agar. (B) Expression of *rbs* operon genes (as determined by RNAseq) in wild-type strains JJ2546 and JJ2548 grown in urine. Gene expression is shown as RPKM (reads per kilobase per million mapped reads). Average data for two biological replicates are shown.

**Table S1.** Frequency of rifampicin-resistant mutants in household #1 and #2 isolates.

| Strain | Frequency of Rif <sup>R</sup><br>mutants per 10 <sup>8</sup> cells |
|--------|--------------------------------------------------------------------|
| MG1655 | 0.7                                                                |
| JJ1886 | 0.8                                                                |
| JJ1887 | 1.0                                                                |
| JJ2546 | 0.6                                                                |
| JJ2547 | 1.9                                                                |
| JJ2548 | 1.5                                                                |
| JJ2963 | 1.1                                                                |
| JJ2974 | 0.3                                                                |

Average frequency of rifampicin-resistant (Rif<sup>R</sup>) mutants were determined for at least two biological replicates.

**Table S2.** Differential expression of plasmid genes in strains JJ1886 and JJ1887.

| Medium       | Plasmid                                      | Gene <sup>a</sup>                         | Product                             | Fold difference <sup>b</sup>   |     |
|--------------|----------------------------------------------|-------------------------------------------|-------------------------------------|--------------------------------|-----|
| <b>Urine</b> | <b>110,040 bp</b><br>(pJJ1886_5 = pJJ1887_4) | P423_26110                                | endoribonuclease                    | 7.7                            |     |
|              |                                              | P423_25600                                | hypothetical protein                | 6.6                            |     |
|              |                                              | P423_26105                                | dihydrodipicolinate synthase        | 8.7                            |     |
|              |                                              | P423_25690                                | hypothetical protein                | -3.4                           |     |
|              |                                              | P423_25685                                | single-stranded DNA-binding protein | -2.9                           |     |
|              |                                              | P423_25995                                | NADH:quinone oxidoreductase         | -2.8                           |     |
|              |                                              | P423_26115                                | 2-keto-3-deoxygluconate permease    | 3.2                            |     |
| <b>LB</b>    | <b>5,631 bp</b><br>(pJJ1886_3 = pJJ1887_3)   | P423_25190                                | mobilization protein                | 2                              |     |
|              |                                              | <b>110,040 bp</b> (pJJ1886_5 = pJJ1887_4) | P423_25600                          | hypothetical protein           | 6.8 |
|              |                                              |                                           | P423_25720                          | transposase Tn3                | 5.1 |
|              |                                              |                                           | P423_26145                          | insertion element protein InsB | 4.3 |
|              |                                              |                                           | P423_25725                          | hypothetical protein           | 2.9 |
|              |                                              |                                           | P423_25955                          | conjugal transfer protein TraA | 2.9 |
|              |                                              |                                           | P423_25675                          | hypothetical protein           | 2.5 |
|              |                                              |                                           | P423_25820                          | conjugal transfer protein TraI | 2.4 |
|              |                                              |                                           | P423_25740                          | transporter                    | 2   |
|              |                                              |                                           | P423_25815                          | conjugal transfer protein TraX | 2   |

<sup>a</sup>NCBI gene number as in the JJ1886 genome.

<sup>b</sup>Gene upregulated in JJ1887 (positive values) and gene upregulated in JJ1886 (negative values). The fold difference was calculated from the ratio of the gene expression between strains. Only genes with difference  $\geq 2$ -fold are shown.



**Table S3.** Intergenic SNPs in the household #2 strains.

| <b>Mutated position<sup>a</sup></b> | <b>Mutation type</b> | <b>Region affected by mutation</b>                                                    | <b>Distance (nt) from mutated position to start codon</b> | <b>Reference or source</b> |
|-------------------------------------|----------------------|---------------------------------------------------------------------------------------|-----------------------------------------------------------|----------------------------|
| 857299                              | G-T                  | promoter of <i>dps</i> (P423_04030)                                                   | 127                                                       | (2)                        |
| 1316931                             | C-T                  | promoter of <i>ycgJ</i> (P423_06490) encoding hypothetical protein                    | 121                                                       | This study <sup>b</sup>    |
| 3425079                             | C-T                  | upstream region of P423_16705 encoding polysialic acid transporter                    | 44                                                        | This study                 |
| 4057275                             | C-A                  | 5'UTR of <i>cspA</i> (P423_19795) involved in regulation of <i>cspA</i> transcription | 74                                                        | (3)                        |

<sup>a</sup>Chromosomal position as in JJ1886 genome.

<sup>b</sup>Promoter location of the mutation was predicted using the RegulonDB database (<http://regulondb.ccg.unam.mx/>).

**Table S4.** Bacterial strains and plasmids used in this study.

| Name                                                                                |                                                                                                                                 | Characteristics and/or use                 |                    |                          | Reference or source           |
|-------------------------------------------------------------------------------------|---------------------------------------------------------------------------------------------------------------------------------|--------------------------------------------|--------------------|--------------------------|-------------------------------|
| <b><u>Wild-type strains</u></b>                                                     |                                                                                                                                 |                                            |                    |                          |                               |
|                                                                                     | <b>Specimen</b>                                                                                                                 | <b>Patient ID</b>                          | <b>Other</b>       | <b>Year of isolation</b> |                               |
| JJ1887                                                                              | urine                                                                                                                           | older sister (index patient), household #1 |                    | 2007                     | (4)                           |
| JJ1886                                                                              | blood                                                                                                                           | younger sister, household #1               |                    | 2007                     | (4)                           |
| JJ2546                                                                              | urine                                                                                                                           | father (index patient), household #2       |                    | 2008                     | (5)                           |
| JJ2547                                                                              | abscess                                                                                                                         | daughter, household #2                     |                    | 2008                     | (5)                           |
| JJ2548                                                                              | blood                                                                                                                           | daughter, household #2                     |                    | 2008                     | (5)                           |
| JJ2963                                                                              | urine                                                                                                                           | mother, household #2                       |                    | 2014                     | (5)                           |
| JJ2974                                                                              | feces                                                                                                                           | mother, household #2                       |                    | 2014                     | (5)                           |
| MVAST2639                                                                           | urine                                                                                                                           | 1173                                       | LrhA mutant (R17G) | 2014                     | J.R. Johnson, Minneapolis, MN |
| MVAST2641                                                                           | blood                                                                                                                           | 1173                                       | LrhA mutant (R17G) | 2014                     | J.R. Johnson, Minneapolis, MN |
| MG1655                                                                              | NA                                                                                                                              | NA                                         | reference strain   | NA                       | (6)                           |
| CD358                                                                               | NA                                                                                                                              | NA                                         | reference strain   | 2007                     | (7)                           |
| JJ2555                                                                              | NA                                                                                                                              | NA                                         | reference strain   | 2007                     | (7)                           |
| JJ1887 plasmid cured                                                                | TET-sensitive derivative of JJ1887 that spontaneously lost plasmid pJJ1887_5                                                    |                                            |                    |                          | This study                    |
| <b><u>Recombinant strains</u></b>                                                   |                                                                                                                                 |                                            |                    |                          |                               |
| JJ1886/pE                                                                           | JJ1886 transformed with plasmid pACYC184                                                                                        |                                            |                    |                          | This study                    |
| JJ1886/pRpoS <sub>JJ1886</sub>                                                      | JJ1886 transformed with plasmid pACYC184 carrying <i>rpoS</i> <sub>JJ1886</sub>                                                 |                                            |                    |                          | This study                    |
| JJ1886/pRpoS <sub>JJ1887</sub>                                                      | JJ1886 transformed with plasmid pACYC184 carrying <i>rpoS</i> <sub>JJ1887</sub>                                                 |                                            |                    |                          | This study                    |
| JJ1886/pLacI <sub>JJ1886</sub>                                                      | JJ1886 transformed with plasmid pACYC184 carrying <i>lacI</i> <sub>JJ1886</sub>                                                 |                                            |                    |                          | This study                    |
| JJ1886/pLacI <sub>JJ1887</sub>                                                      | JJ1886 transformed with plasmid pACYC184 carrying <i>lacI</i> <sub>JJ1887</sub>                                                 |                                            |                    |                          | This study                    |
| JJ1886/pLrhA <sub>JJ1887</sub>                                                      | JJ1886 transformed with plasmid pACYC184 carrying <i>lrhA</i> <sub>JJ1887</sub>                                                 |                                            |                    |                          | This study                    |
| JJ2548/pE                                                                           | JJ2548 transformed with plasmid pACYC184                                                                                        |                                            |                    |                          | This study                    |
| JJ2548/pLrhA <sub>JJ1887</sub>                                                      | JJ2548 transformed with plasmid pACYC184 carrying <i>lrhA</i> <sub>JJ1887</sub>                                                 |                                            |                    |                          | This study                    |
| <i>E.coli</i> XL1-Blue                                                              | Host used for gene amplification and cloning                                                                                    |                                            |                    |                          | Stratagene                    |
| <b><u>Recombinant plasmids</u></b>                                                  |                                                                                                                                 |                                            |                    |                          |                               |
| pE                                                                                  | plasmid pACYC184 used for gene expression in wild-type <i>E. coli</i> strains with chloramphenicol selection (Cm <sup>R</sup> ) |                                            |                    |                          |                               |
| pRpoS <sub>JJ1886</sub>                                                             | pACYC184 containing <i>rpoS</i> <sub>JJ1886</sub> cloned using XbaI/XhoI, Cm <sup>R</sup>                                       |                                            |                    |                          | This study                    |
| pRpoS <sub>JJ1887</sub>                                                             | pACYC184 containing <i>rpoS</i> <sub>JJ1887</sub> cloned using XbaI/XhoI, Cm <sup>R</sup>                                       |                                            |                    |                          | This study                    |
| pLacI <sub>JJ1886</sub>                                                             | pACYC184 containing <i>lacI</i> <sub>JJ1886</sub> cloned using XbaI/XhoI, Cm <sup>R</sup>                                       |                                            |                    |                          | This study                    |
| pLacI <sub>JJ1887</sub>                                                             | pACYC184 containing <i>lacI</i> <sub>JJ1887</sub> cloned using XbaI/XhoI, Cm <sup>R</sup>                                       |                                            |                    |                          | This study                    |
| pLrhA <sub>JJ1887</sub>                                                             | pACYC184 containing <i>lrhA</i> <sub>JJ1887</sub> cloned using XbaI/XhoI, Cm <sup>R</sup>                                       |                                            |                    |                          | This study                    |
| TET, tetracycline; Cm <sup>R</sup> , chloramphenicol resistant; NA, not applicable. |                                                                                                                                 |                                            |                    |                          |                               |

**Table S5.** Primers used in this study.

| <b>Primer name</b>            | <b>Sequence 5'-3'</b>                              |
|-------------------------------|----------------------------------------------------|
| <b><i>gene cloning</i></b>    |                                                    |
| lrhA_xbaI_F                   | GGAGTCTAGAACAGGAGGAATTAACCATGATAAGTGCAAATCGTCCG    |
| lrhA_xhoI_R                   | CACACTCGAGTTACTCGATATCCCTTTCAATCAAC                |
| lacI_xbaI_F                   | GGAACGTCTAGAACAGGAGGAATTAACCATGAAACCAGTAACGTTATACG |
| lacI_xhoI_R                   | GAGGAACTAGTCTCGAGTCACTGCCCGCTTTCCAGTCGG            |
| rpoS_xbaI_F                   | GGAGTCTAGAACAGGAGGAATTAACCATGAGTCAGAATACGCTGAAAG   |
| rpoS_xhoI_R                   | GTGGCTCGAGTTATTTCGCGGAACAGCGCTTC                   |
| <b><i>gene sequencing</i></b> |                                                    |
| lrhA_F                        | CACAGCATTAACCAGCTCAGT                              |
| lrhA_R                        | CCCAGCGGTTTCGTTTTTACAC                             |
| lacI_F                        | CATCTTCCGGCGCTGCAAC                                |
| lacI_R                        | CCTCTTCGCTATTTTCGCCAG                              |
| rpoS_F                        | CAACCATGGGTAGCACC                                  |
| rpoS_R                        | CCAATGTGCTTGCGTCAACC                               |
| deoR_F                        | CTCAACACGATTCACCTCT                                |
| deoR_R                        | CGGTCCAGTCTTGCGCC                                  |
| cspE_F                        | CCTCTTCCGGTTCTACTGCC                               |
| cspE_R                        | CTGTTTTCCGCCTCAACCGC                               |
| dapA_F                        | ATGCCGAAAACCATTGAAG                                |
| dapA_R                        | TTCAGGCGTGAAATTAACCGC                              |
| ompN_F                        | ATGAAAAGCAAAGTACTG                                 |
| ompN_R                        | GGTAGAGATGCCGTTGGCAGCGTAG                          |
| gadA_F                        | ATGGACCAGAAGCTGTTAAC                               |
| gadA_R                        | TCAGGTGTGTTTAAAGC                                  |
| P423_00080_F                  | TGGGCTACGATGGCTTTGG                                |
| P423_00080_R                  | TCGGCTCGTGGAGTGGGTTG                               |
| degS_F                        | GAGTTTTCTCTGGGATTTGG                               |
| degS_R                        | GCTGCACATTTTCCAGTACAGG                             |
| ykgC_F                        | CTACGTCTGCCTTCTCCC                                 |
| ykgC_R                        | AATATCGGCTGTATCCCAACC                              |
| nfsB_F                        | GCAGCGGATTTGGCAACACG                               |
| nfsB_R                        | GCAAGGAACGGATACG                                   |
| ydbk_F                        | GCAGCGGATTTGGCAACACG                               |
| ydbk_R                        | GCAAGGAACGGATACG                                   |
| lipA_F                        | CCTCTTCCGGTTCTACTGCC                               |
| lipA_R                        | CTATTTGTACCCGCCGTTGCC                              |
| dps_F                         | CGTCATCTTTTCGCTTCGCC                               |
| dps_R                         | CGTACTTTTCTCTACACC                                 |
| ycgJ_F                        | CCGCACCCTAATCGTGACAGC                              |
| ycgJ_R                        | AGCCCGCCAGCGTCATTCC                                |
| dnaC_F                        | GGCAGTTGGGGTTCTTG                                  |
| dnaC_R                        | GTTCATGGTCATGCGGT                                  |
| ydbH_F                        | GTTCGGGTAATGGTCGCTGG                               |
| ydbH_R                        | GCTCCAGCCATGCCTGGAG                                |
| yebC_F                        | CACCGTTATGGTAAACTTCC                               |
| yebC_R                        | CAGACATCGTAAAGCTGCGC                               |
| yfaL_F                        | GGATCTGTGAAGATCACTG                                |
| yfaL_R                        | GTTACCGTAAACCAGGGCG                                |
| P423_12990_F                  | CACGATTGTCCACCGACC                                 |

**Table S5.** Continued.

| <b>Primer name</b> | <b>Sequence 5'-3'</b>       |
|--------------------|-----------------------------|
| P423_12990_R       | CAATTCGGGCGGCAGCC           |
| fadJ_F             | CCCCACGCTCGCTCATCTC         |
| fadJ_R             | CGCAAACCATCGCCACCAC         |
| P423_13360_F       | ACTCTGACACTCTCTTCT          |
| P423_13360_R       | TGAACCACCAACCGCTGCC         |
| crr_F              | TCATTGCTCCGCTCTCTG          |
| crr_R              | CACCTACGGTTACGCTACC         |
| fhlA_F             | CTTACGCAGCCACCGTAAGAAC      |
| fhlA_R             | CAGCGGCATATCGCCCCTTC        |
| sdaC_F             | GGTCAGGCACCTTCCCGG          |
| sdaC_R             | GAGATGATCGGAGAGTGGTTG       |
| mltA_F             | ACCGGTGCAAAAGATTGCGG        |
| mltA_R             | TGGGCACGGTTGTGGCAATG        |
| P423_16465_F       | TCAGCAATAACTCCCCTTC         |
| P423_16465_R       | CCAGATACTCGACAAACC          |
| P423_16480_F       | CATATGCTCCTGACACCCCCTC      |
| P423_16480_R       | TTTATATATCTTCCCTTCTGC       |
| P423_16705_F       | CCTGCCATCCAGACGATAAGC       |
| P423_16705_R       | CAATTTATCCCTGCCGAAATAATTTCC |
| rapZ_F             | GTACTIONGATCGTCAGCGG        |
| rapZ_R             | GCGTCCGATGGCGTACTGG         |
| malT_F             | TGAAATCAAGGACATCAGAG        |
| malT_R             | GCAAGATTTGTGCACGGG          |
| ftsY_F             | AGATTTTCCCGGCGCTGGG         |
| ftsY_R             | GGCAGAATGCGGTAAGCCAGG       |
| P423_19450_F       | ATCCCCGCCAGCTCCGC           |
| P423_19450_R       | CTCCCTTTGAATTGCCTC          |
| cspA_F             | CATCACCCACCAATGCGT          |
| cspA_R             | CTGCCGGCCTTTAGCGCC          |
| glyS_F             | CTGCAACAGCGAAATATCCGC       |
| glyS_R             | CTTCGGTATCGGCCAGCATC        |
| gltS_F             | CGCACCGACCATCGGCAC          |
| gltS_R             | ACACTCCACCACACCGAAC         |
| frvA_F             | GCAGACATCGGATTGTGCAT        |
| frvA_R             | GAATAAAGCGGAGGCGATTG        |
| ilvN_F             | CACCGCAATCTTGTTAAACATC      |
| ilvN_R             | CGGCGCTGATCCATGTGC          |
| rbsR_F             | TGGTGCCTGGCGTTGAACG         |
| rbsR_R             | GGTCGGCTGGGTTATCCGATGG      |
| P423_21035_F       | TGTAGCGGTACACCCATGG         |
| P423_21035_R       | GACAAGATGGCGAAGAGTGA        |
| P423_21850_F       | GAGAAAGCAGTATTTGCG          |
| P423_21850_R       | GTCTGCATTATCGATACAGAG       |
| ntrC_F             | AGTCATTGGCACTGGCTGG         |
| ntrC_R             | GGTTGTGGTAAAGAAGTCG         |
| bsmA_F             | GGTACAAAATGGCTTGTGAA        |
| bsmA_R             | GGTTAGCAGGAAACGTAATAG       |
| P423_24355_F       | CTGGACACATCCTTCACCC         |
| P423_24355_R       | CTCTTACACTCCGCGCT           |

### Supplementary data references:

1. Lewis M, Chang G, Horton NC, Kercher MA, Pace HC, Schumacher MA, Brennan RG, Lu P. 1996. Crystal structure of the lactose operon repressor and its complexes with DNA and inducer. *Science* 271:1247-54.
2. Jeong KC, Baumler DJ, Kaspar CW. 2006. dps expression in *Escherichia coli* O157:H7 requires an extended -10 region and is affected by the cAMP receptor protein. *Biochim Biophys Acta* 1759:51-9.
3. Jiang W, Fang L, Inouye M. 1996. The role of the 5'-end untranslated region of the mRNA for CspA, the major cold-shock protein of *Escherichia coli*, in cold-shock adaptation. *J Bacteriol* 178:4919-25.
4. Owens RC, Jr., Johnson JR, Stogsdill P, Yarmus L, Lolans K, Quinn J. 2011. Community transmission in the United States of a CTX-M-15-producing sequence type ST131 *Escherichia coli* strain resulting in death. *J Clin Microbiol* 49:3406-8.
5. Ender PT, Gajanana D, Johnston B, Clabots C, Tamarkin FJ, Johnson JR. 2009. Transmission of an extended-spectrum-beta-lactamase-producing *Escherichia coli* (sequence type ST131) strain between a father and daughter resulting in septic shock and Emphysematous pyelonephritis. *J Clin Microbiol* 47:3780-2.
6. Blattner FR, Plunkett G, 3rd, Bloch CA, Perna NT, Burland V, Riley M, Collado-Vides J, Glasner JD, Rode CK, Mayhew GF, Gregor J, Davis NW, Kirkpatrick HA, Goeden MA, Rose DJ, Mau B, Shao Y. 1997. The complete genome sequence of *Escherichia coli* K-12. *Science* 277:1453-62.
7. Johnson JR, Davis G, Clabots C, Johnston BD, Porter S, DebRoy C, Pomputius W, Ender PT, Cooperstock M, Slater BS, Banerjee R, Miller S, Kisiela D, Sokurenko EV, Aziz M, Price LB. 2016. Household Clustering of *Escherichia coli* Sequence Type 131 Clinical and Fecal Isolates According to Whole Genome Sequence Analysis. *Open Forum Infect Dis* 3:ofw129.
